# Supplementary material for: Positive genetic associations among fitness traits support evolvability of a reef-building coral under multiple stressors
Source: bioRxiv or medRxiv preprint supplement (doi:10.1101/572321), 2019-03-10
Supplement: Supplementary file [file media-1.pdf]

1 **Supplementary Figures**

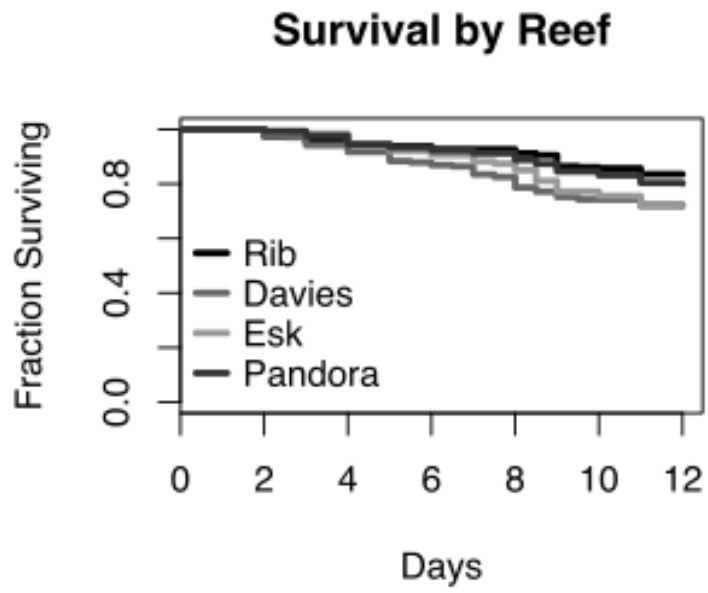

2

3 Supplementary Figure 1: Survival rates by reef of origin.

4

5

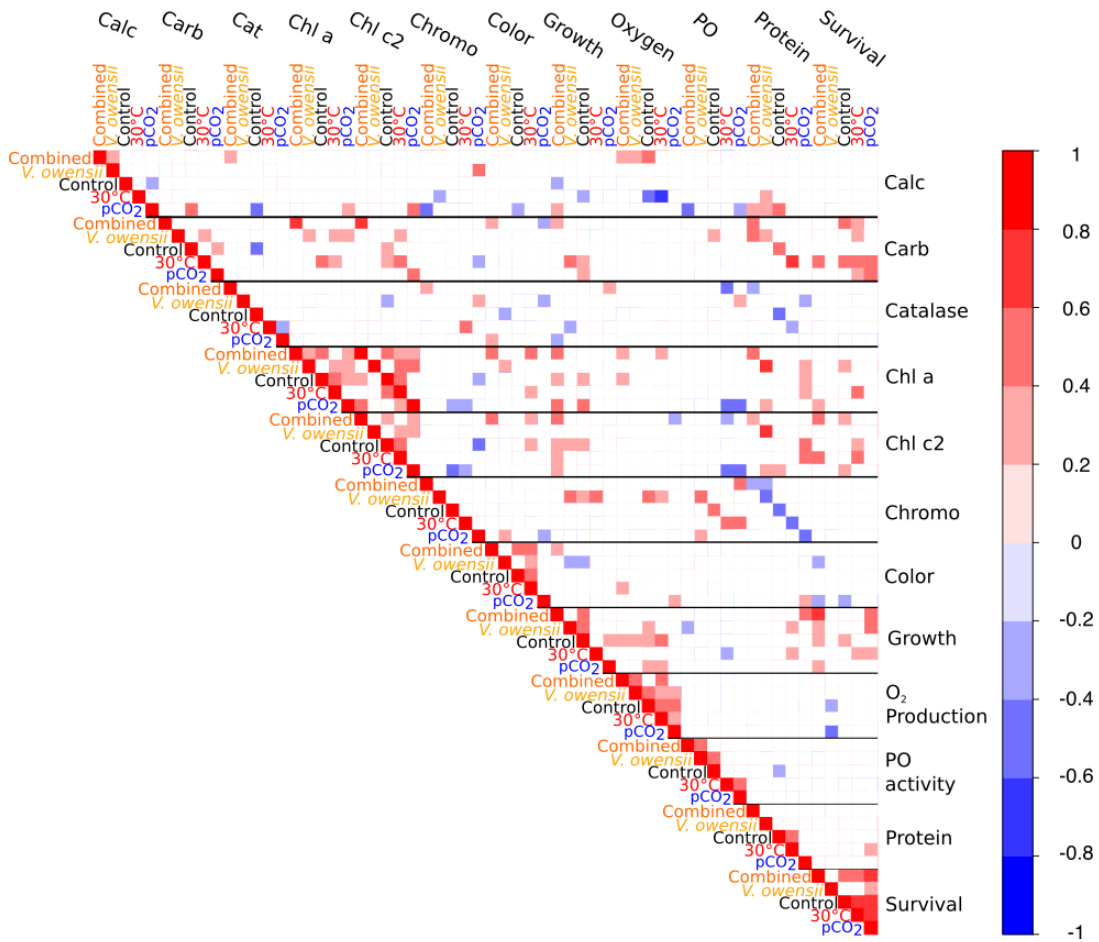

6

7

8 Supplementary Figure 2: Pearson correlation heatmap based on scaled average phenotypic values  
9 for 38 genotypes. Labels indicate the treatment and trait measurement. Colors within the  
10 heatmap squares represent the magnitude and direction of the Pearson correlation according to  
11 the inset key. Only significant ( $p < 0.05$ ) correlations are shown.

12
